# Supplementary material
Source: PubMed Central journal article supplement (PMC9433425)
Supplement: supplementary_bhab437.pdf [file supplementary_bhab437.pdf]

Supplementary Materials

**Transcription Factors *Bcl11a* and *Bcl11b* Are Required for the Production and Differentiation of Cortical Projection Neurons**

Authors: Heng Du, Ziwu Wang, Rongliang Guo, Lin Yang, Guoping Liu, Zhuangzhi

Zhang, Zhejun Xu, Yu Tian, Zhengang Yang, Xiaosu Li, Bin Chen

Supplemental Figures S1-S5

Supplemental Tables S1-S5

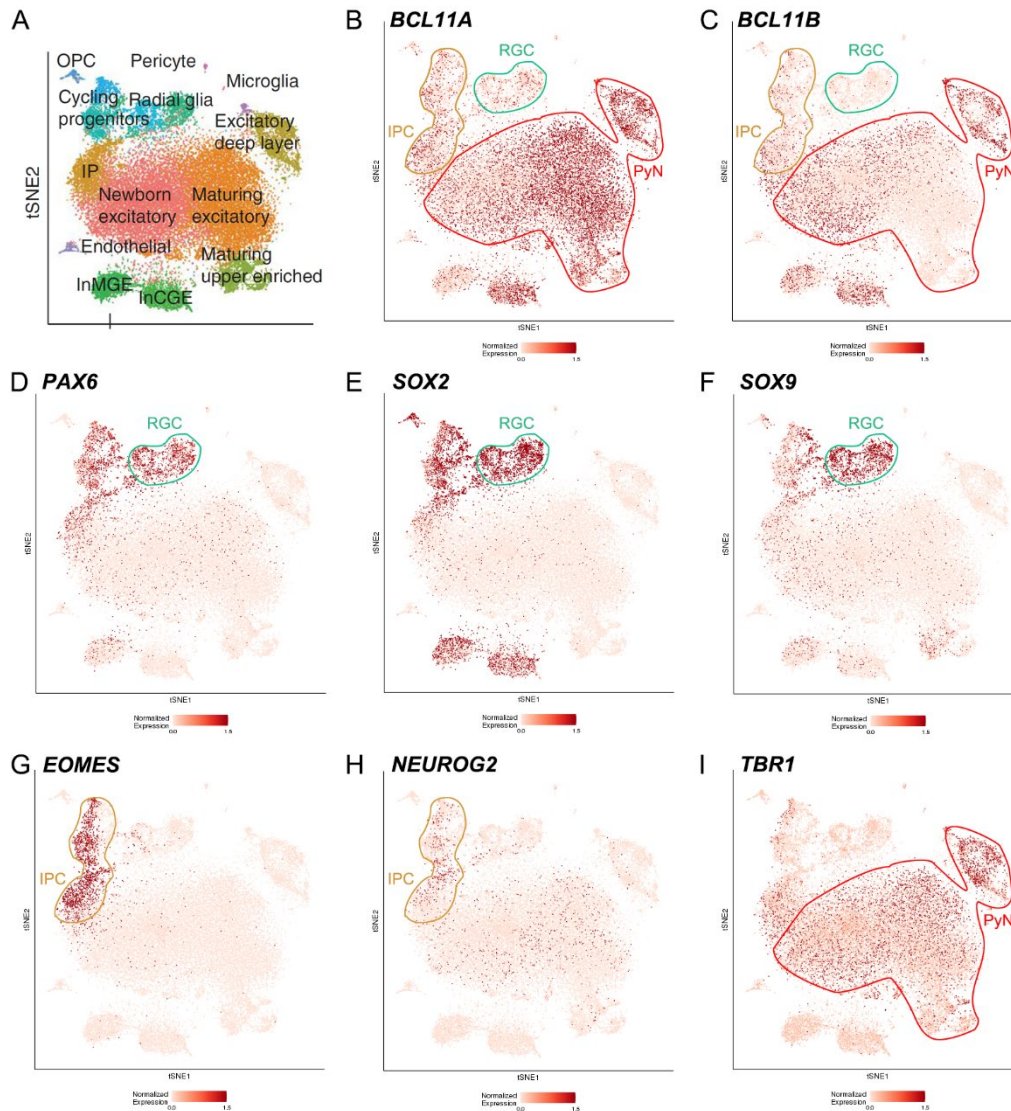

**Figure S1. *BCL11A* is expressed in cortical RGCs in the human brain at GW17 and GW18.**

(A) scRNA-seq analysis of 33,976 cortical cells from the mid-gestation human brain (GW17-GW18) (Polioudakis et al. 2019).

(B-F) Feature plots show that *BCL11A*, *PAX6*, *SOX2* and *SOX9* are expressed in the cortical RGCs (green circles), whereas *BCL11B* is mainly expressed in a few projection neuron intermediate progenitors (brown circles) and a large number of newly born projection neurons and deep layer projection neurons (red circles).

(G-I) Distributions of *EOMES*<sup>+</sup>, *NEUROG2*<sup>+</sup> and *TBR1*<sup>+</sup> cells.

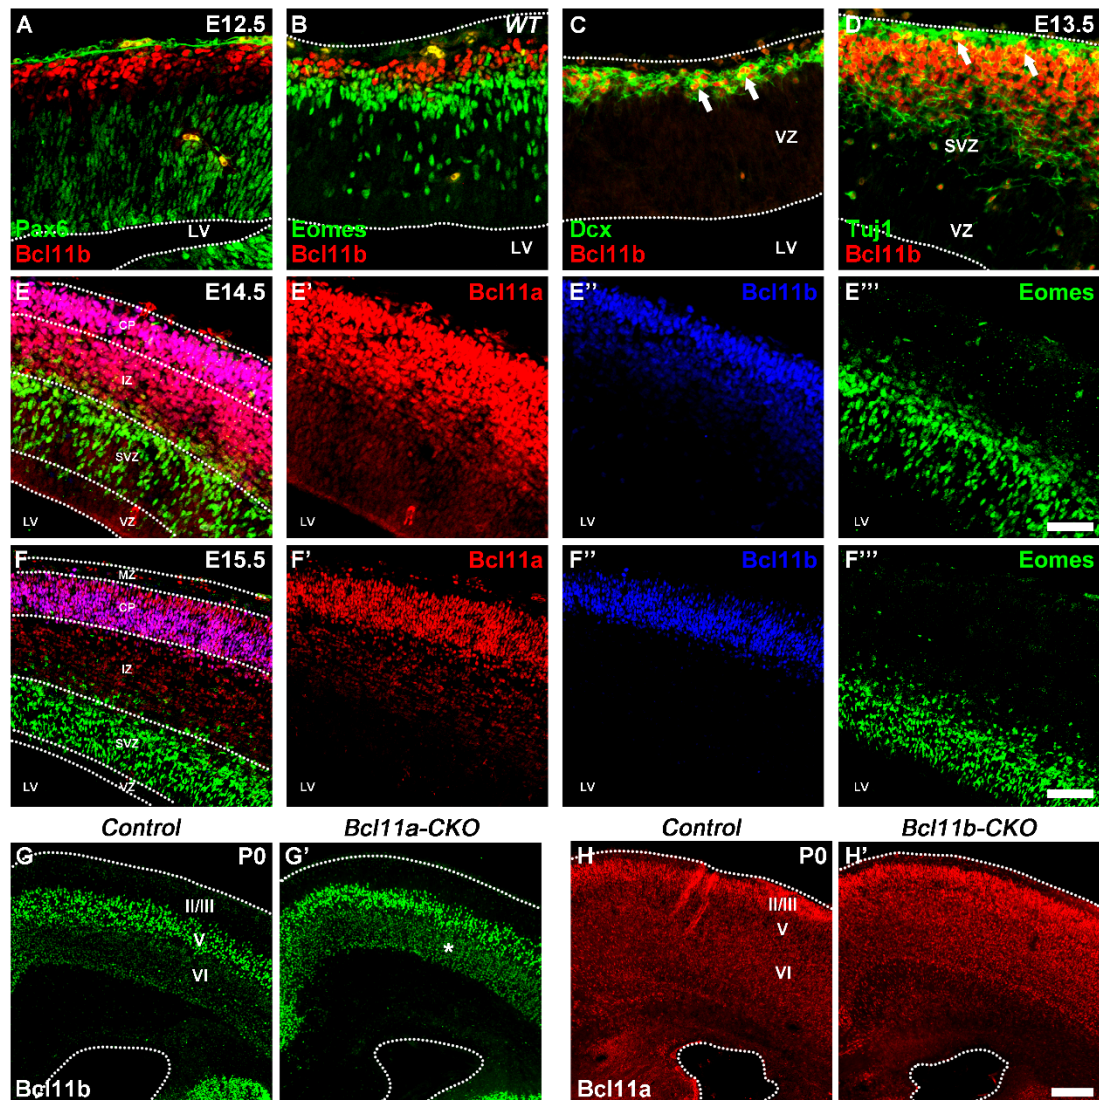

**Figure S2. *Bcl11b* is mainly expressed in the postmitotic projection neurons and might have redundant function with *Bcl11a*.**

(A-D) *Bcl11b* is expressed in *Dcx*<sup>+</sup> and *Tuj1*<sup>+</sup> postmitotic neurons at E12.5 and E13.5, respectively (arrows). It is not expressed in *Pax6*<sup>+</sup> or *Eomes*<sup>+</sup> progenitor cells in the VZ/SVZ.

(E-E''') *Bcl11a* and *Bcl11b* are co-expressed in migrating neurons in the upper IZ and CP of cortex at E14.5. Note that the *Bcl11a* expression in VZ and *Eomes*<sup>+</sup> SVZ.

(F-F''') *Bcl11a* and *Bcl11b* are co-expressed in neurons in the cortical plate of cortex at E15.5.

(G-G') Increased expression of *Bcl11b* in the layer VI of P0 *Bcl11a*-CKO cortices (asterisk in G').

(H-H') Expression of *Bcl11a* in all layers of the cortex is increased in *Bcl11b*-CKO cortices.

LV, Lateral Ventricle. VZ, Ventricular Zone. SVZ, Subventricular Zone. IZ, Intermediate Zone. CP, Cortical Plate. MZ, Marginal Zone. White dashed lines indicate the cortical layer boundaries.

Scale bars: 50  $\mu$ m in E''' for A-E'''; 100  $\mu$ m in F''' for F-F'''; 200  $\mu$ m in H' for G-H'.

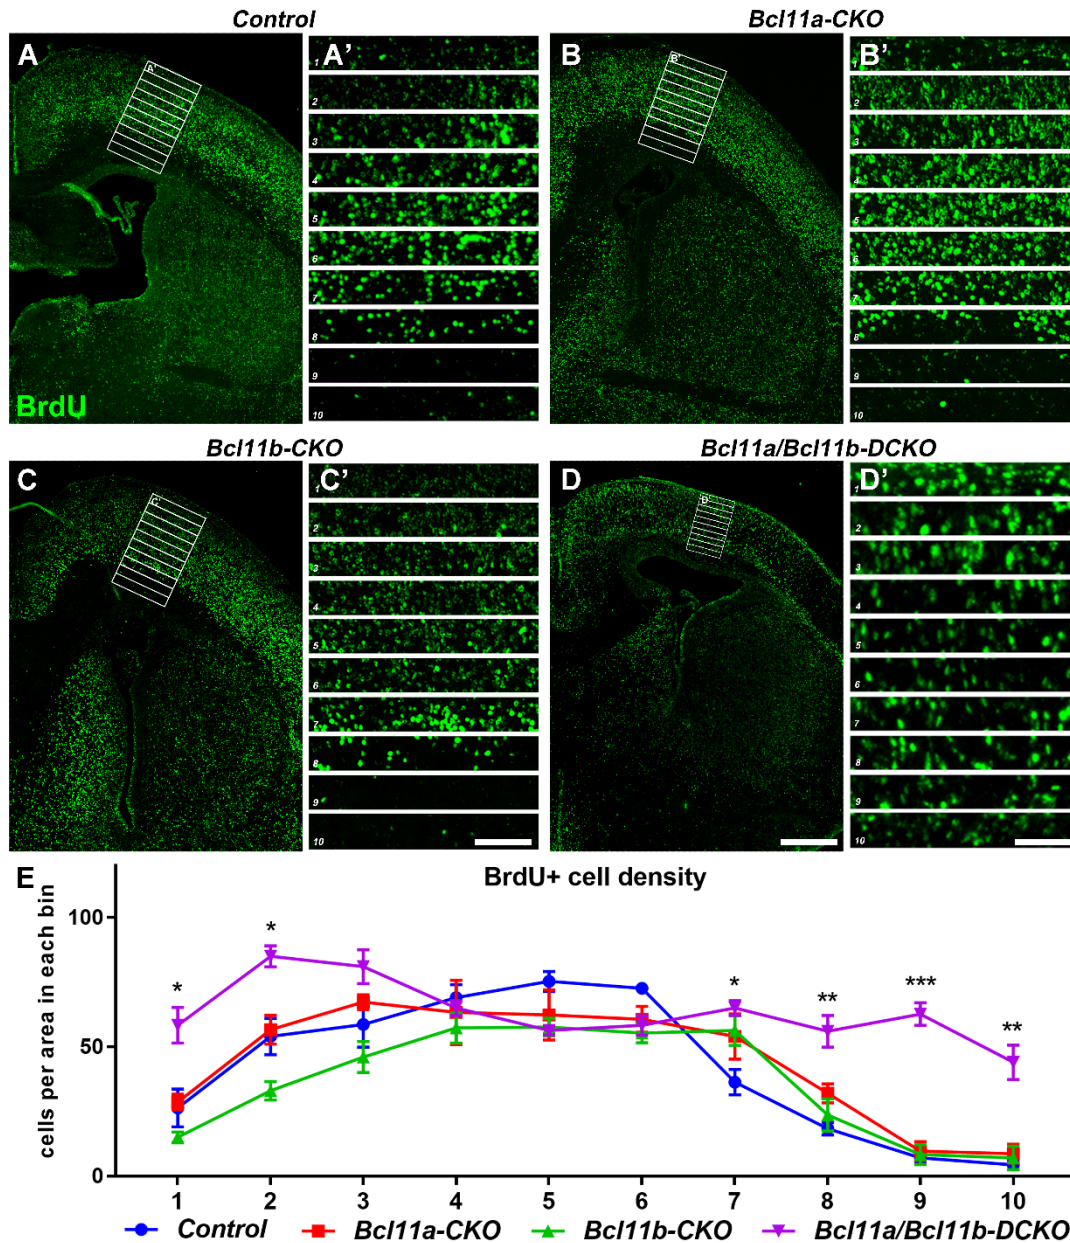

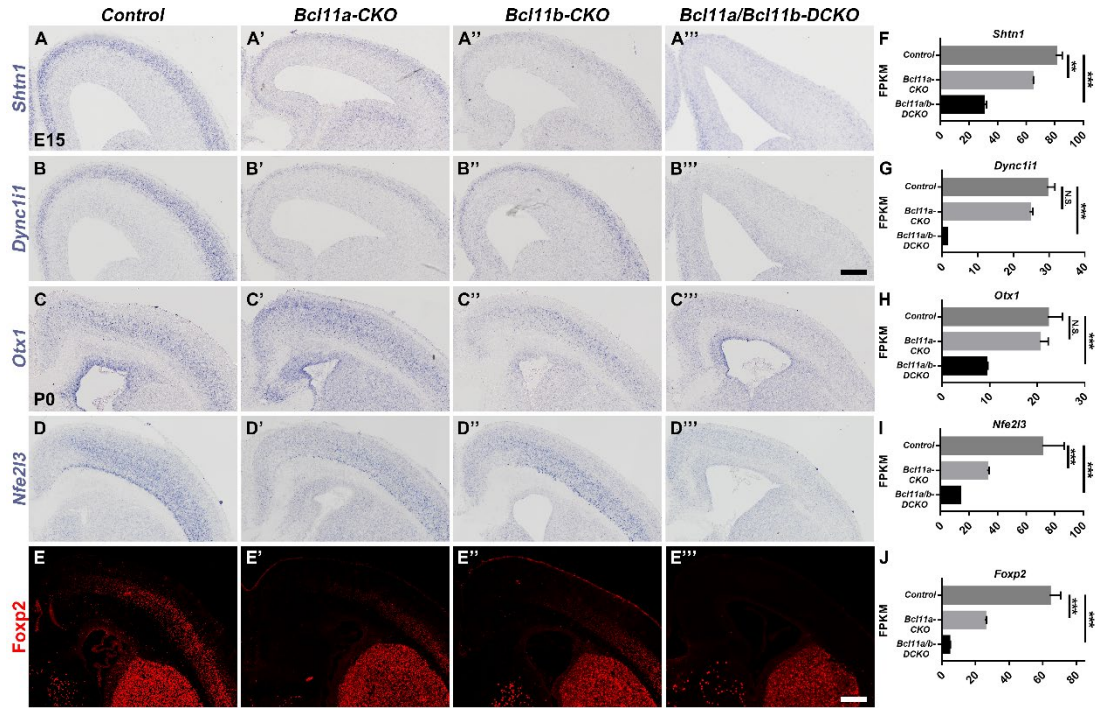

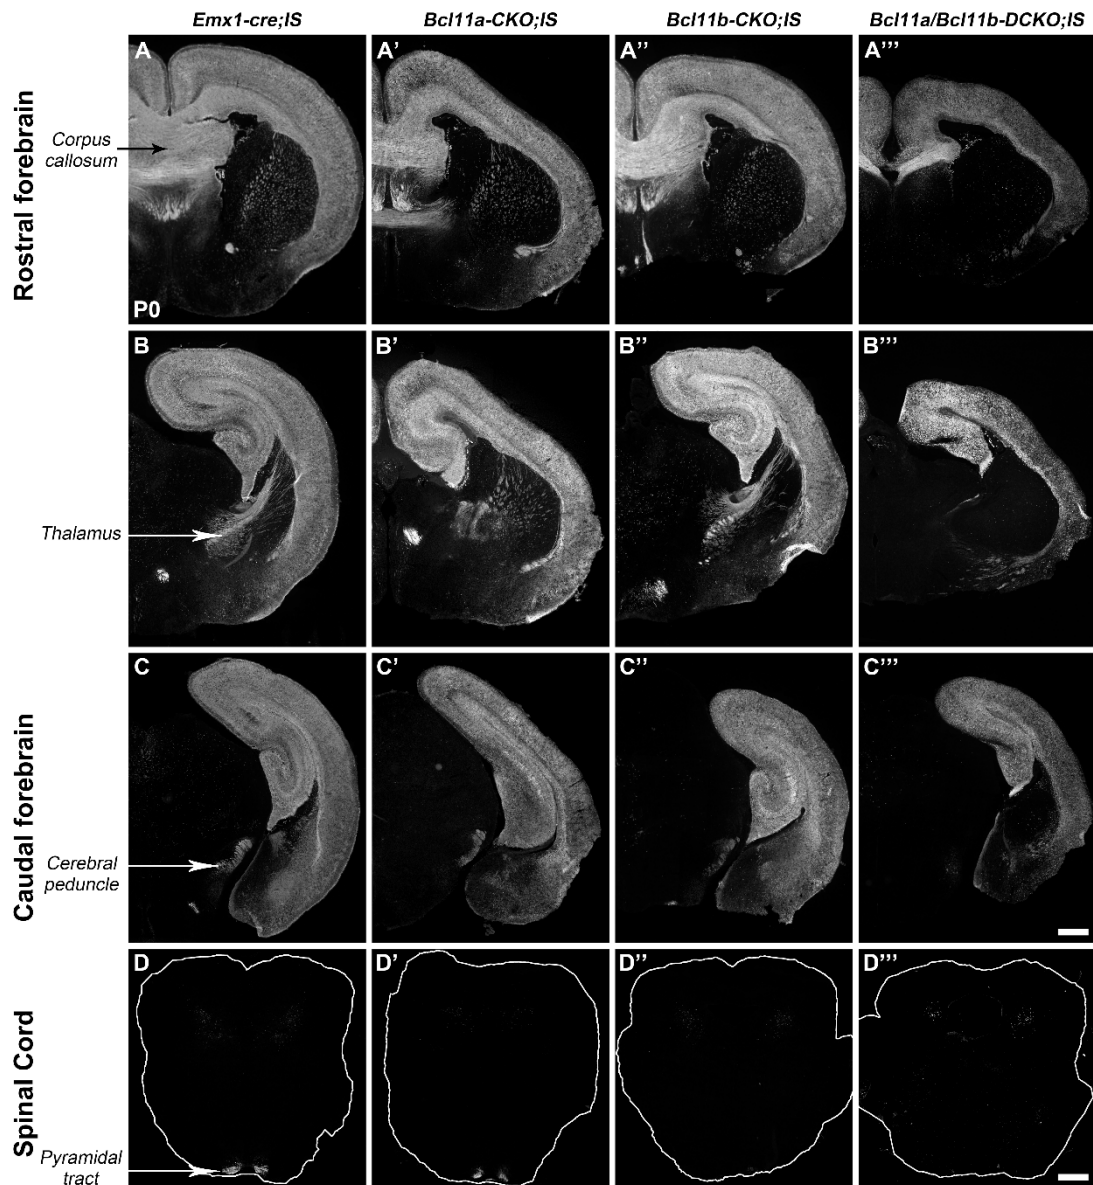

**Figure S5. Defective axonal projections in *Bcl11a/b-DCKO* at P0.**

(A–D''') Coronal sections show tdTomato staining in control (*Emx1-cre; IS*) brains (A–D), *Bcl11a-CKO; IS* brains (A'–D'), *Bcl11b-CKO; IS* brains (A''–D'') and *Bcl11a/b-DCKO; IS* brains (A'''–D''').

(A–A''') The corpus callosum is present in control (A, arrow), *Bcl11a-CKO; IS* (A') and *Bcl11b-CKO; IS* (A'') brains, but absent in *Bcl11a/b-DCKO* (A''') mice.

(B–C''') Decreased tdTomato labels of the thalamus and cerebral peduncle in the *Bcl11a/b-DCKO* mice (B''' and C'''), compared to the controls (B and C, arrow).

(D–D''') tdTomato labels axonal projection towards spinal cord in the control mice (arrow), but these axons are absent in the *Bcl11b-CKO* and *Bcl11a/b-DCKO* (D'' and D''') mice.

White lines indicate the spinal cord boundaries.

Scale bars: 400  $\mu$ m in C''' for A–C'''; 500  $\mu$ m in D''' for D–D'''.

**Supplementary Table 1. Expression of genes that are related to the cortex development in the *control* and *Bcl11a-CKO* mice cortices at E15.5.**

| <b>Gene name</b> | <b>Control FPKM</b> | <b><i>Bcl11a-CKO</i> FPKM</b> | <b>Fold Change Mutant/Control</b> | <b>P-value</b> | <b>Up/Down Regulation</b> |
|------------------|---------------------|-------------------------------|-----------------------------------|----------------|---------------------------|
| <i>Aldh111</i>   | 1.0312              | 6.1356                        | 5.9503                            | 6.30E-29       | Up                        |
| <i>Bcl11a</i>    | 40.4253             | 30.9569                       | 0.7658                            | 0.000234       |                           |
| <i>Bcl11b</i>    | 29.8266             | 33.1120                       | 1.1101                            | 0.118228       |                           |
| <i>Ccnd2</i>     | 50.0772             | 31.0891                       | 0.6208                            | 1.71E-10       |                           |
| <i>Dcx</i>       | 66.4680             | 76.9619                       | 1.1579                            | 0.027519       |                           |
| <i>Dmrt3</i>     | 3.1753              | 0.4570                        | 0.1439                            | 1.54E-13       | Down                      |
| <i>Egfr</i>      | 0.1307              | 0.4622                        | 3.5369                            | 4.24E-07       | Up                        |
| <i>Eomes</i>     | 30.2043             | 45.3425                       | 1.5012                            | 1.79E-07       |                           |
| <i>Fgfbp3</i>    | 9.7139              | 35.5890                       | 3.6637                            | 6.04E-27       | Up                        |
| <i>Fgfr1</i>     | 11.4882             | 14.2032                       | 1.2363                            | 0.003394       |                           |
| <i>Fgfr3</i>     | 5.2403              | 2.8005                        | 0.5344                            | 9.31E-09       |                           |
| <i>Gfap</i>      | 0.1403              | 0.8771                        | 6.2496                            | 1.31E-07       | Up                        |
| <i>Gli1</i>      | 0.7555              | 2.0729                        | 2.7439                            | 4.02E-06       | Up                        |
| <i>Mdga1</i>     | 16.8022             | 22.4995                       | 1.3391                            | 2.78E-05       |                           |
| <i>Mki67</i>     | 33.9124             | 26.8396                       | 0.7914                            | 0.002404       |                           |
| <i>Neurog2</i>   | 82.0721             | 72.6492                       | 0.8852                            | 0.142635       |                           |
| <i>Nr2f1</i>     | 32.5453             | 38.9908                       | 1.1980                            | 0.088315       |                           |
| <i>Nr4a2</i>     | 4.7211              | 1.2588                        | 0.2666                            | 6.46E-22       | Down                      |
| <i>Ntsr1</i>     | 11.3771             | 4.5980                        | 0.4041                            | 1.29E-13       | Down                      |
| <i>Pax6</i>      | 3.7565              | 3.1458                        | 0.8374                            | 0.053872       |                           |
| <i>Pou3f1</i>    | 23.0142             | 37.3520                       | 1.6230                            | 1.52E-08       |                           |
| <i>Ppp1r14c</i>  | 2.9001              | 15.9259                       | 5.4916                            | 3.90E-38       | Up                        |
| <i>Reln</i>      | 16.7732             | 7.1768                        | 0.4279                            | 1.09E-22       | Down                      |
| <i>Sema3c</i>    | 3.1089              | 10.9470                       | 3.5212                            | 1.16E-29       | Up                        |
| <i>Sox5</i>      | 21.7790             | 18.7828                       | 0.8624                            | 0.0643         |                           |
| <i>Sox9</i>      | 13.9668             | 13.2056                       | 0.9455                            | 0.62468        |                           |
| <i>Tbr1</i>      | 59.9832             | 59.3366                       | 0.9892                            | 0.969624       |                           |
| <i>Tle4</i>      | 29.9653             | 12.8159                       | 0.4277                            | 5.03E-21       | Down                      |
| <i>Zfpm2</i>     | 13.5080             | 8.3678                        | 0.6195                            | 2.25E-06       |                           |

**Supplementary Table 2. Expression of genes that are related to the cortex development in the *control* and *Bcl11a/b-DCKO* mice cortices at E15.5.**

| <b>Gene name</b> | <b>Control FPKM</b> | <b><i>Bcl11a/b-DCKO</i> FPKM</b> | <b>Fold Change Mutant/Control</b> | <b>P-value</b> | <b>Up/Down Regulation</b> |
|------------------|---------------------|----------------------------------|-----------------------------------|----------------|---------------------------|
| <i>Afap1</i>     | 11.3000             | 17.4572                          | 1.5449                            | 7.46E-09       |                           |
| <i>Aldh111</i>   | 1.0312              | 8.2935                           | 8.0429                            | 5.78E-48       | Up                        |
| <i>Bcl11a</i>    | 40.4253             | 37.4005                          | 0.9252                            | 0.3090279      |                           |
| <i>Bcl11b</i>    | 29.8266             | 9.9527                           | 0.3337                            | 4.29E-44       | Down                      |
| <i>Bcl2</i>      | 5.0985              | 2.1317                           | 0.4181                            | 1.94E-14       | Down                      |
| <i>Bhlhe22</i>   | 77.9455             | 150.3423                         | 1.9288                            | 9.21E-17       |                           |
| <i>Btbd17</i>    | 1.7325              | 2.2325                           | 1.2886                            | 0.0402416      |                           |
| <i>Calb2</i>     | 4.9070              | 2.3370                           | 0.4762                            | 0.033736       | Down                      |
| <i>Ccnd2</i>     | 50.0772             | 27.4090                          | 0.5473                            | 4.76E-16       |                           |
| <i>Cdk1</i>      | 7.5492              | 5.3411                           | 0.7075                            | 0.0053469      |                           |
| <i>Cdkn1a</i>    | 1.6232              | 3.1973                           | 1.9697                            | 0.0001689      |                           |
| <i>Cdkn1c</i>    | 22.2832             | 135.4342                         | 6.0779                            | 1.60E-89       | Up                        |
| <i>Cnr1</i>      | 23.3896             | 7.6092                           | 0.3253                            | 6.12E-40       | Down                      |
| <i>Crym</i>      | 3.3955              | 0.0322                           | 0.0095                            | 2.87E-17       | Down                      |
| <i>Dcx</i>       | 66.4680             | 107.5273                         | 1.6177                            | 3.77E-12       |                           |
| <i>Dll3</i>      | 3.3921              | 6.7682                           | 1.9953                            | 3.86E-06       |                           |
| <i>Dmrt3</i>     | 3.1753              | 0.4354                           | 0.1371                            | 4.76E-15       | Down                      |
| <i>Drd1</i>      | 3.1416              | 0.6655                           | 0.2118                            | 5.90E-13       | Down                      |
| <i>Dync1i1</i>   | 29.3735             | 1.3259                           | 0.0451                            | 7.28E-135      | Down                      |
| <i>Egfr</i>      | 0.1307              | 0.3716                           | 2.8437                            | 0.0013802      | Up                        |
| <i>Eomes</i>     | 30.2043             | 53.2434                          | 1.7628                            | 7.99E-12       |                           |
| <i>Fezf2</i>     | 101.2119            | 40.2679                          | 0.3979                            | 3.47E-29       | Down                      |
| <i>Fgf10</i>     | 0.1974              | 1.8669                           | 9.4596                            | 7.32E-13       | Up                        |
| <i>Fgf9</i>      | 0.0780              | 1.1871                           | 15.2090                           | 5.56E-16       | Up                        |
| <i>Fgfbp3</i>    | 9.7139              | 40.1972                          | 4.1381                            | 6.25E-41       | Up                        |
| <i>Fgfr1</i>     | 11.4882             | 20.3873                          | 1.7746                            | 1.02E-13       |                           |
| <i>Fgfr3</i>     | 5.2403              | 3.1705                           | 0.6050                            | 4.87E-05       |                           |
| <i>Foxp1</i>     | 2.6184              | 0.7857                           | 0.3001                            | 1.31E-24       | Down                      |
| <i>Foxp2</i>     | 1.1232              | 0.4402                           | 0.3919                            | 2.55E-12       | Down                      |
| <i>Gfap</i>      | 0.1403              | 0.6406                           | 4.5643                            | 0.0001367      | Up                        |
| <i>Gli1</i>      | 0.7555              | 2.9785                           | 3.9426                            | 1.06E-10       | Up                        |
| <i>Grin2b</i>    | 8.6000              | 3.4758                           | 0.4042                            | 7.69E-26       | Down                      |
| <i>Hes1</i>      | 4.7647              | 3.8553                           | 0.8092                            | 0.1741981      |                           |
| <i>Hes5</i>      | 11.4375             | 10.0113                          | 0.8753                            | 0.3949257      |                           |
| <i>Kcnip2</i>    | 2.5947              | 0.5199                           | 0.2004                            | 1.14E-15       | Down                      |



|                 |          |          |         |           |      |
|-----------------|----------|----------|---------|-----------|------|
| <i>Kitl</i>     | 13.1480  | 7.8357   | 0.5960  | 8.71E-08  |      |
| <i>Ldb2</i>     | 8.2274   | 15.3210  | 1.8622  | 7.08E-10  |      |
| <i>Lhx5</i>     | 2.3460   | 0.6783   | 0.2891  | 2.51E-07  | Down |
| <i>Mcm2</i>     | 10.5935  | 8.5693   | 0.8089  | 0.0318085 |      |
| <i>Mdga1</i>    | 16.8022  | 31.4370  | 1.8710  | 6.63E-19  |      |
| <i>Mef2c</i>    | 3.4977   | 0.7358   | 0.2104  | 8.77E-35  | Down |
| <i>Mfap4</i>    | 11.1832  | 18.4530  | 1.6501  | 8.60E-05  |      |
| <i>Mfng</i>     | 18.3552  | 28.6349  | 1.5600  | 8.69E-08  |      |
| <i>Mki67</i>    | 33.9124  | 26.9169  | 0.7937  | 0.0022885 |      |
| <i>Myt1</i>     | 8.4231   | 14.0197  | 1.6644  | 1.01E-10  |      |
| <i>Ndnf</i>     | 2.4464   | 0.4780   | 0.1954  | 1.98E-25  | Down |
| <i>Neurod1</i>  | 15.8175  | 52.2984  | 3.3064  | 4.44E-30  | Up   |
| <i>Neurod2</i>  | 281.7421 | 336.2981 | 1.1936  | 0.0132214 |      |
| <i>Neurog1</i>  | 5.0904   | 2.4895   | 0.4891  | 0.0028718 | Down |
| <i>Neurog2</i>  | 82.0721  | 73.2875  | 0.8930  | 0.1897317 |      |
| <i>Nfe2l3</i>   | 15.9578  | 1.8420   | 0.1154  | 7.70E-54  | Down |
| <i>Nfia</i>     | 15.5346  | 5.4248   | 0.3492  | 1.37E-26  | Down |
| <i>Nfib</i>     | 44.3172  | 29.5822  | 0.6675  | 1.57E-08  |      |
| <i>Ngfr</i>     | 5.5404   | 1.1132   | 0.2009  | 3.77E-17  | Down |
| <i>Nkd1</i>     | 4.5828   | 39.8333  | 8.6920  | 6.30E-101 | Up   |
| <i>Npy</i>      | 18.1199  | 14.7368  | 0.8133  | 0.2058603 |      |
| <i>Nr2f1</i>    | 32.5453  | 65.8627  | 2.0237  | 1.19E-10  | Up   |
| <i>Nr4a2</i>    | 4.7211   | 1.4869   | 0.3150  | 1.86E-17  | Down |
| <i>Nrn1</i>     | 33.6567  | 47.5920  | 1.4140  | 3.87E-05  |      |
| <i>Nrp1</i>     | 41.4263  | 45.3376  | 1.0944  | 0.3041812 |      |
| <i>Ntsr1</i>    | 11.3771  | 0.3801   | 0.0334  | 1.06E-103 | Down |
| <i>Otx1</i>     | 8.1931   | 4.3395   | 0.5297  | 1.00E-10  |      |
| <i>Pax6</i>     | 3.7565   | 2.9533   | 0.7862  | 0.0082724 |      |
| <i>Plk2</i>     | 51.8646  | 10.8920  | 0.2100  | 4.34E-57  | Down |
| <i>Ppp1r14c</i> | 2.9001   | 48.4728  | 16.7144 | 3.64E-119 | Up   |
| <i>Ppp1r1b</i>  | 15.3680  | 2.9069   | 0.1892  | 2.72E-49  | Down |
| <i>Ptgds</i>    | 0.1751   | 2.0172   | 11.5222 | 6.24E-12  | Up   |
| <i>Rbfox3</i>   | 10.5809  | 22.6728  | 2.1428  | 8.09E-23  | Up   |
| <i>Reln</i>     | 16.7732  | 5.1502   | 0.3071  | 2.51E-42  | Down |
| <i>Rgs16</i>    | 23.1465  | 15.1468  | 0.6544  | 0.0001679 |      |
| <i>Rgs4</i>     | 4.4245   | 0.7844   | 0.1773  | 3.20E-26  | Down |
| <i>Rorb</i>     | 2.1224   | 0.4825   | 0.2273  | 2.83E-21  | Down |
| <i>Satb2</i>    | 36.8346  | 14.9631  | 0.4062  | 1.94E-22  | Down |
| <i>Sema3c</i>   | 3.1089   | 28.5964  | 9.1983  | 2.48E-115 | Up   |
| <i>Shtn1</i>    | 80.7700  | 30.1365  | 0.3731  | 5.05E-27  | Down |
| <i>Slc17a6</i>  | 10.7140  | 26.5073  | 2.4741  | 5.62E-24  | Up   |

|                |           |          |        |           |      |
|----------------|-----------|----------|--------|-----------|------|
| <i>Slc17a7</i> | 26.5065   | 8.9046   | 0.3359 | 3.91E-23  | Down |
| <i>Sorl1</i>   | 14.1777   | 45.4353  | 3.2047 | 9.85E-49  | Up   |
| <i>Sox2</i>    | 31.2417   | 34.3124  | 1.0983 | 0.2822599 |      |
| <i>Sox5</i>    | 21.7790   | 9.9107   | 0.4551 | 3.60E-21  | Down |
| <i>Sox9</i>    | 13.9668   | 15.6395  | 1.1198 | 0.2096425 |      |
| <i>Sstr2</i>   | 14.0834   | 29.2136  | 2.0743 | 4.97E-16  | Up   |
| <i>Stat3</i>   | 1.1375    | 1.5717   | 1.3817 | 0.0108098 |      |
| <i>Tbr1</i>    | 59.9832   | 55.7837  | 0.9300 | 0.3913116 |      |
| <i>Tle4</i>    | 29.9653   | 5.4233   | 0.1810 | 3.86E-66  | Down |
| <i>Top2a</i>   | 24.7892   | 18.7964  | 0.7582 | 0.0003678 |      |
| <i>Trp73</i>   | 2.3517    | 1.4684   | 0.6244 | 0.0052581 |      |
| <i>Tubb3</i>   | 1066.8663 | 779.8322 | 0.7310 | 3.03E-05  |      |
| <i>Unc5d</i>   | 15.3338   | 26.8387  | 1.7503 | 1.65E-13  |      |
| <i>Wnt7a</i>   | 10.6869   | 7.4993   | 0.7017 | 0.0009286 |      |
| <i>Wnt7b</i>   | 56.9553   | 116.4431 | 2.0445 | 1.40E-14  | Up   |
| <i>Zfpn2</i>   | 13.5080   | 1.2499   | 0.0925 | 2.08E-59  | Down |
| <i>Zic1</i>    | 2.0900    | 1.4964   | 0.7160 | 0.0442943 |      |
| <i>Zic2</i>    | 4.3427    | 2.8843   | 0.6642 | 0.0086696 |      |
| <i>Zic5</i>    | 1.2664    | 0.7126   | 0.5627 | 0.0068358 |      |

---

**Supplementary Table 3. Expression of genes that are related to the cortex development in the *control* and *Bcl11a/b-DCKO* mice cortices at P0.**

| <b>Gene name</b> | <b>Control FPKM</b> | <b><i>Bcl11a/b-DCKO</i> FPKM</b> | <b>Fold Change Mutant/Control</b> | <b>P-value</b> | <b>Up/Down Regulation</b> |
|------------------|---------------------|----------------------------------|-----------------------------------|----------------|---------------------------|
| <i>Aldh111</i>   | 46.2437             | 61.8143                          | 1.3367                            | 0.002774       |                           |
| <i>Aldoc</i>     | 82.5117             | 159.5087                         | 1.9332                            | 4.52E-14       |                           |
| <i>Bcl11a</i>    | 409.5873            | 592.1500                         | 1.4457                            | 4.48E-05       |                           |
| <i>Bcl11b</i>    | 204.2823            | 38.5227                          | 0.1886                            | 6.31E-64       | Down                      |
| <i>Bhlhe40</i>   | 26.8627             | 39.0717                          | 1.4545                            | 0.000887       |                           |
| <i>Calb2</i>     | 5.4993              | 151.5227                         | 27.5529                           | 6.33E-218      | Up                        |
| <i>Cxcr4</i>     | 17.1750             | 37.9720                          | 2.2109                            | 1.12E-08       | Up                        |
| <i>Dab1</i>      | 286.5500            | 223.2330                         | 0.7790                            | 0.001089       |                           |
| <i>Dcx</i>       | 1949.6447           | 1954.961                         | 1.0027                            | 0.950360       |                           |
| <i>Eomes</i>     | 11.0030             | 74.1083                          | 6.7353                            | 3.67E-63       | Up                        |
| <i>Etv1</i>      | 38.0783             | 17.0743                          | 0.4484                            | 1.55E-08       | Down                      |
| <i>Foxg1</i>     | 747.6570            | 594.2537                         | 0.7948                            | 0.014782       |                           |
| <i>Foxp1</i>     | 309.2393            | 39.9200                          | 0.1291                            | 1.07E-78       | Down                      |
| <i>Foxp2</i>     | 64.0943             | 4.1770                           | 0.0652                            | 3.13E-64       | Down                      |
| <i>Gfap</i>      | 12.0383             | 95.9200                          | 7.9679                            | 1.49E-17       | Up                        |
| <i>Grin2d</i>    | 43.4693             | 162.8753                         | 3.7469                            | 4.13E-27       | Up                        |
| <i>Kcnip2</i>    | 38.3540             | 13.8013                          | 0.3598                            | 7.48E-16       | Down                      |
| <i>Kitl</i>      | 72.4863             | 21.6530                          | 0.2987                            | 3.84E-24       | Down                      |
| <i>Lhx1</i>      | 1.1333              | 0.1980                           | 0.1747                            | 0.000196       | Down                      |
| <i>Lhx2</i>      | 172.2050            | 242.9673                         | 1.4109                            | 3.04E-06       |                           |
| <i>Lhx5</i>      | 2.2850              | 0.2817                           | 0.1233                            | 3.09E-08       | Down                      |
| <i>Limch1</i>    | 351.1327            | 498.1790                         | 1.4188                            | 1.20E-07       |                           |
| <i>Mapk1</i>     | 382.2553            | 253.6013                         | 0.6634                            | 2.84E-09       |                           |
| <i>Mapk3</i>     | 113.0363            | 89.7153                          | 0.7937                            | 0.010098       |                           |
| <i>Mef2c</i>     | 1261.6157           | 280.0517                         | 0.2220                            | 8.05E-127      | Down                      |
| <i>Ndnf</i>      | 33.2557             | 7.2857                           | 0.2191                            | 6.61E-24       | Down                      |
| <i>Nectin3</i>   | 83.7247             | 46.7260                          | 0.5581                            | 8.55E-11       |                           |
| <i>Nes</i>       | 69.6680             | 139.4857                         | 2.0021                            | 2.80E-20       | Up                        |
| <i>Neurod1</i>   | 26.1340             | 57.3560                          | 2.1947                            | 2.38E-12       | Up                        |
| <i>Neurog2</i>   | 6.0633              | 11.4840                          | 1.8940                            | 0.000818       |                           |
| <i>Nfe2l3</i>    | 71.2687             | 13.6113                          | 0.1910                            | 3.88E-22       | Down                      |
| <i>Nfia</i>      | 79.2773             | 51.2337                          | 0.6463                            | 9.56E-07       |                           |
| <i>Nfib</i>      | 461.1463            | 355.3367                         | 0.7706                            | 0.001193       |                           |
| <i>Npy</i>       | 92.1963             | 8.9253                           | 0.0968                            | 1.46E-58       | Down                      |
| <i>Nr2f1</i>     | 262.0877            | 229.9617                         | 0.8774                            | 0.106616       |                           |

|                |          |          |        |           |      |
|----------------|----------|----------|--------|-----------|------|
| <i>Nr4a2</i>   | 101.9373 | 1.3277   | 0.0130 | 2.38E-203 | Down |
| <i>Nrgn</i>    | 148.6550 | 17.6927  | 0.1190 | 6.99E-94  | Down |
| <i>Olig2</i>   | 34.6457  | 50.0673  | 1.4451 | 0.000472  |      |
| <i>Otx1</i>    | 22.2020  | 9.2867   | 0.4183 | 2.18E-07  | Down |
| <i>Pax6</i>    | 17.4647  | 34.8653  | 1.9963 | 1.90E-09  |      |
| <i>Pou3f2</i>  | 248.6283 | 280.4107 | 1.1278 | 0.232851  |      |
| <i>Ppp1r1b</i> | 82.9170  | 12.8493  | 0.1550 | 4.04E-54  | Down |
| <i>Rbfox3</i>  | 148.5227 | 113.3613 | 0.7633 | 0.001503  |      |
| <i>Reln</i>    | 438.5267 | 121.2583 | 0.2765 | 8.95E-50  | Down |
| <i>Rgs4</i>    | 42.6540  | 27.7073  | 0.6496 | 0.000862  |      |
| <i>Rorb</i>    | 69.8387  | 9.3097   | 0.1333 | 1.62E-63  | Down |
| <i>Satb2</i>   | 552.6263 | 407.2697 | 0.7370 | 5.22E-05  |      |
| <i>Slc1a3</i>  | 167.0117 | 255.3190 | 1.5287 | 5.32E-06  |      |
| <i>Sox5</i>    | 210.5717 | 51.6850  | 0.2455 | 1.22E-56  | Down |
| <i>Sox9</i>    | 34.8903  | 56.4387  | 1.6176 | 0.000129  |      |
| <i>Tbr1</i>    | 375.8343 | 220.2417 | 0.5860 | 5.73E-11  |      |
| <i>Tle4</i>    | 153.6600 | 20.3317  | 0.1323 | 3.52E-94  | Down |
| <i>Trp73</i>   | 9.4113   | 2.6277   | 0.2792 | 1.09E-07  | Down |
| <i>Vldlr</i>   | 157.2760 | 93.8580  | 0.5968 | 1.57E-08  |      |
| <i>Zbtb20</i>  | 135.5923 | 188.7323 | 1.3919 | 0.007166  |      |
| <i>Zbtb22</i>  | 43.2430  | 60.6777  | 1.4032 | 0.001384  |      |
| <i>Zbtb46</i>  | 11.7887  | 37.5260  | 3.1832 | 1.94E-17  | Up   |
| <i>Zfpm2</i>   | 28.9900  | 9.8067   | 0.3383 | 1.31E-14  | Down |

---

**Supplementary Table 4. A list of genes that are related to the cortex development in the *Bcl11a/b-DCKO* mice compared to the *Bcl11a-CKO* mice at E15.5.**

| <b>Gene name</b> | <b><i>Bcl11a-CKO</i><br/>FPKM</b> | <b><i>Bcl11a/b-DCKO</i><br/>FPKM</b> | <b>Fold Change<br/><i>DCKO/CKO</i></b> | <b>P-value</b> | <b>Up/Down<br/>Regulation</b> |
|------------------|-----------------------------------|--------------------------------------|----------------------------------------|----------------|-------------------------------|
| <i>Aldh1l1</i>   | 6.1356                            | 8.2935                               | 1.3517                                 | 0.006784       |                               |
| <i>Bcl11a</i>    | 30.9569                           | 37.4005                              | 1.2081                                 | 0.010107       |                               |
| <i>Bcl11b</i>    | 33.1120                           | 9.9527                               | 0.3006                                 | 1.85E-50       | Down                          |
| <i>Bcl2</i>      | 5.1647                            | 2.1317                               | 0.4127                                 | 2.15E-13       | Down                          |
| <i>Bhlhe22</i>   | 114.8573                          | 150.3423                             | 1.3089                                 | 0.001007       |                               |
| <i>Calb2</i>     | 3.0075                            | 2.3370                               | 0.7771                                 | 0.557359       |                               |
| <i>Ccnd2</i>     | 31.0891                           | 27.4090                              | 0.8816                                 | 0.099078       |                               |
| <i>Cdkn1a</i>    | 1.9897                            | 3.1973                               | 1.6069                                 | 0.004780       |                               |
| <i>Cdkn1c</i>    | 41.6815                           | 135.4342                             | 3.2493                                 | 4.29E-48       | Up                            |
| <i>Cnr1</i>      | 21.6272                           | 7.6092                               | 0.3518                                 | 1.97E-38       | Down                          |
| <i>Dcx</i>       | 76.9619                           | 107.5273                             | 1.3971                                 | 3.38E-06       |                               |
| <i>Dync1i1</i>   | 24.5575                           | 1.3259                               | 0.0540                                 | 2.69E-141      | Down                          |
| <i>Egfr</i>      | 0.4622                            | 0.3716                               | 0.8040                                 | 0.368309       |                               |
| <i>Eomes</i>     | 45.3425                           | 53.2434                              | 1.1742                                 | 0.049063       |                               |
| <i>Fezf2</i>     | 103.7060                          | 40.2679                              | 0.3883                                 | 9.12E-35       | Down                          |
| <i>Fgf10</i>     | 0.7500                            | 1.8669                               | 2.4892                                 | 0.000616       | Up                            |
| <i>Fgf9</i>      | 0.1241                            | 1.1871                               | 9.5667                                 | 9.38E-14       | Up                            |
| <i>Fgfbp3</i>    | 35.5890                           | 40.1972                              | 1.1295                                 | 0.221015       |                               |
| <i>Fgfr1</i>     | 14.2032                           | 20.3873                              | 1.4354                                 | 4.70E-06       |                               |
| <i>Fgfr3</i>     | 2.8005                            | 3.1705                               | 1.1321                                 | 0.305878       |                               |
| <i>Foxp1</i>     | 2.0510                            | 0.7857                               | 0.3831                                 | 1.42E-14       | Down                          |
| <i>Foxp2</i>     | 1.2189                            | 0.4402                               | 0.3612                                 | 6.56E-16       | Down                          |
| <i>Gfap</i>      | 0.8771                            | 0.6406                               | 0.7303                                 | 0.271329       |                               |
| <i>Gli1</i>      | 2.0729                            | 2.9785                               | 1.4369                                 | 0.021040       |                               |
| <i>Grin2b</i>    | 7.9068                            | 3.4758                               | 0.4396                                 | 1.26E-23       | Down                          |
| <i>Hes1</i>      | 3.6152                            | 3.8553                               | 1.0664                                 | 0.674065       |                               |
| <i>Hes5</i>      | 7.6778                            | 10.0113                              | 1.3039                                 | 0.079010       |                               |
| <i>Kcnip2</i>    | 0.8897                            | 0.5199                               | 0.5843                                 | 0.052244       |                               |
| <i>Kitl</i>      | 12.6109                           | 7.8357                               | 0.6213                                 | 1.23E-06       |                               |
| <i>Ldb2</i>      | 10.3898                           | 15.3210                              | 1.4746                                 | 7.17E-05       |                               |
| <i>Lhx5</i>      | 0.4260                            | 0.6783                               | 1.5923                                 | 0.173915       |                               |
| <i>Mcm2</i>      | 8.7431                            | 8.5693                               | 0.9801                                 | 0.804755       |                               |
| <i>Mdga1</i>     | 22.4995                           | 31.4370                              | 1.3972                                 | 3.74E-06       |                               |
| <i>Mef2c</i>     | 2.3452                            | 0.7358                               | 0.3137                                 | 1.51E-32       | Down                          |

|                 |          |          |        |          |      |
|-----------------|----------|----------|--------|----------|------|
| <i>Mfap4</i>    | 15.5459  | 18.4530  | 1.1870 | 0.150607 |      |
| <i>Mfng</i>     | 21.0708  | 28.6349  | 1.3590 | 0.000339 |      |
| <i>Mki67</i>    | 26.8396  | 26.9169  | 1.0029 | 1        |      |
| <i>Neurod1</i>  | 25.9647  | 52.2984  | 2.0142 | 3.19E-13 | Up   |
| <i>Neurod2</i>  | 308.0404 | 336.2981 | 1.0917 | 0.255699 |      |
| <i>Neurod6</i>  | 436.7113 | 394.0276 | 0.9023 | 0.161831 |      |
| <i>Neurog1</i>  | 1.4357   | 2.4895   | 1.7340 | 0.081906 |      |
| <i>Neurog2</i>  | 72.6492  | 73.2875  | 1.0088 | 0.944061 |      |
| <i>Nfe2l3</i>   | 8.5170   | 1.8420   | 0.2163 | 2.55E-25 | Down |
| <i>Nfia</i>     | 9.6343   | 5.4248   | 0.5631 | 1.39E-13 |      |
| <i>Nfib</i>     | 34.5406  | 29.5822  | 0.8564 | 0.026532 |      |
| <i>Ngfr</i>     | 9.2637   | 1.1132   | 0.1202 | 9.52E-43 | Down |
| <i>Nkd1</i>     | 9.4077   | 39.8333  | 4.2341 | 1.12E-54 | Up   |
| <i>Npy</i>      | 54.1403  | 14.7368  | 0.2722 | 3.93E-15 | Down |
| <i>Nr2f1</i>    | 38.9908  | 65.8627  | 1.6892 | 1.65E-10 |      |
| <i>Nr4a2</i>    | 1.2588   | 1.4869   | 1.1813 | 0.375360 |      |
| <i>Nrn1</i>     | 37.6713  | 47.5920  | 1.2633 | 0.010108 |      |
| <i>Nrp1</i>     | 45.1718  | 45.3376  | 1.0037 | 0.992459 |      |
| <i>Ntsr1</i>    | 4.5980   | 0.3801   | 0.0827 | 2.21E-37 | Down |
| <i>Otx1</i>     | 5.9092   | 4.3395   | 0.7344 | 0.003577 |      |
| <i>Pax6</i>     | 3.1458   | 2.9533   | 0.9388 | 0.456606 |      |
| <i>Plk2</i>     | 48.6992  | 10.8920  | 0.2237 | 10.8920  | Down |
| <i>Ppp1r14c</i> | 15.9259  | 48.4728  | 3.0436 | 1.41E-33 | Up   |
| <i>Ppp1r1b</i>  | 10.6667  | 2.9069   | 0.2725 | 1.41E-28 | Down |
| <i>Ptgds</i>    | 1.2563   | 2.0172   | 1.6056 | 0.042194 |      |
| <i>Rbfox3</i>   | 14.1818  | 22.6728  | 1.5987 | 1.34E-09 |      |
| <i>Reln</i>     | 7.1768   | 5.1502   | 0.7176 | 0.000556 |      |
| <i>Rgs4</i>     | 1.9567   | 0.7844   | 0.4009 | 2.32E-06 | Down |
| <i>Rorb</i>     | 1.8986   | 0.4825   | 0.2542 | 3.46E-20 | Down |
| <i>Satb2</i>    | 30.1277  | 14.9631  | 0.4967 | 6.38E-08 | Down |
| <i>Sema3c</i>   | 10.9470  | 28.5964  | 2.6123 | 2.93E-21 | Up   |
| <i>Shtn1</i>    | 64.4964  | 30.1365  | 0.4673 | 2.44E-19 | Down |
| <i>Slc17a6</i>  | 15.4021  | 26.5073  | 1.7210 | 7.50E-09 |      |
| <i>Slc17a7</i>  | 17.6509  | 8.9046   | 0.5045 | 8.35E-10 |      |
| <i>Sorl1</i>    | 26.9017  | 45.4353  | 1.6889 | 4.53E-12 |      |
| <i>Sox5</i>     | 18.7828  | 9.9107   | 0.5276 | 3.99E-14 |      |
| <i>Sox9</i>     | 13.2056  | 15.6395  | 1.1843 | 0.073192 |      |
| <i>Sstr2</i>    | 20.0683  | 29.2136  | 1.4557 | 2.87E-05 |      |
| <i>Stat3</i>    | 1.4163   | 1.5717   | 1.1098 | 0.420291 |      |
| <i>Tbr1</i>     | 59.3366  | 55.7837  | 0.9401 | 0.430101 |      |
| <i>Tle4</i>     | 12.8159  | 5.4233   | 0.4232 | 2.49E-20 | Down |

|              |           |          |        |          |      |
|--------------|-----------|----------|--------|----------|------|
| <i>Top2a</i> | 21.0646   | 18.7964  | 0.8923 | 0.127418 |      |
| <i>Trp73</i> | 1.4182    | 1.4684   | 1.0354 | 0.884637 |      |
| <i>Tubb3</i> | 1000.8402 | 779.8322 | 0.7792 | 0.000628 |      |
| <i>Unc5d</i> | 21.7085   | 26.8387  | 1.2363 | 0.006095 |      |
| <i>Wnt7a</i> | 8.7311    | 7.4993   | 0.8589 | 0.206613 |      |
| <i>Wnt7b</i> | 105.5850  | 116.4431 | 1.1028 | 0.236269 |      |
| <i>Zfpm2</i> | 8.3678    | 1.2499   | 0.1494 | 2.60E-38 | Down |
| <i>Zic1</i>  | 2.3686    | 1.4964   | 0.6318 | 0.006706 |      |
| <i>Zic2</i>  | 3.4550    | 2.8843   | 0.8348 | 0.259248 |      |
| <i>Zic5</i>  | 0.8750    | 0.7126   | 0.8144 | 0.338064 |      |

---

**Supplementary Table 5. A list of genes that are related to the cortex development in the *Bcl11a/b-DCKO* mice compared to the *Bcl11a-CKO* mice at P0.**

| <b>Gene name</b> | <b><i>Bcl11a-CKO</i><br/>FPKM</b> | <b><i>Bcl11a/b-DCKO</i><br/>FPKM</b> | <b>Fold Change<br/><i>DCKO/CKO</i></b> | <b>P-value</b> | <b>Up/Down<br/>Regulation</b> |
|------------------|-----------------------------------|--------------------------------------|----------------------------------------|----------------|-------------------------------|
| <i>Aldh111</i>   | 53.8570                           | 61.8143                              | 1.1477                                 | 0.087205       |                               |
| <i>Aldoc</i>     | 98.5763                           | 159.5087                             | 1.6181                                 | 4.51E-09       |                               |
| <i>Bcl11a</i>    | 468.8033                          | 592.1500                             | 1.2631                                 | 6.29E-05       |                               |
| <i>Bcl11b</i>    | 114.9830                          | 38.5227                              | 0.3350                                 | 7.17E-61       | Down                          |
| <i>Bhlhe40</i>   | 47.5950                           | 39.0717                              | 0.8209                                 | 0.005208       |                               |
| <i>Calb2</i>     | 58.3213                           | 151.5227                             | 2.5981                                 | 2.08E-59       | Up                            |
| <i>Cxcr4</i>     | 32.9077                           | 37.9720                              | 1.1539                                 | 0.087778       |                               |
| <i>Dab1</i>      | 223.1493                          | 223.2330                             | 1.0004                                 | 0.994605       |                               |
| <i>Dcx</i>       | 2015.0743                         | 1954.9613                            | 0.9702                                 | 0.693105       |                               |
| <i>Eomes</i>     | 40.4727                           | 74.1083                              | 1.8311                                 | 2.15E-07       |                               |
| <i>Etv1</i>      | 46.7903                           | 17.0743                              | 0.3649                                 | 1.02E-27       | Down                          |
| <i>Foxg1</i>     | 361.7077                          | 594.2537                             | 1.6429                                 | 1.41E-17       |                               |
| <i>Foxp1</i>     | 126.1057                          | 39.9200                              | 0.3166                                 | 2.71E-91       | Down                          |
| <i>Foxp2</i>     | 25.5670                           | 4.1770                               | 0.1634                                 | 2.74E-32       | Down                          |
| <i>Gfap</i>      | 35.6687                           | 95.9200                              | 2.6892                                 | 4.58E-13       | Up                            |
| <i>Grin2b</i>    | 382.7713                          | 290.9743                             | 0.7602                                 | 3.78E-07       |                               |
| <i>Kcnip2</i>    | 29.9910                           | 13.8013                              | 0.4602                                 | 5.81E-16       | Down                          |
| <i>Kitl</i>      | 91.3730                           | 21.6530                              | 0.2370                                 | 6.36E-69       | Down                          |
| <i>Lhx2</i>      | 191.2123                          | 242.9673                             | 1.2707                                 | 5.64E-05       |                               |
| <i>Limch1</i>    | 492.5107                          | 498.1790                             | 1.0115                                 | 0.842152       |                               |
| <i>Mapk1</i>     | 311.2707                          | 253.6013                             | 0.8147                                 | 6.13E-05       |                               |
| <i>Mapk3</i>     | 102.3413                          | 89.7153                              | 0.8766                                 | 0.009089       |                               |
| <i>Mef2c</i>     | 924.4717                          | 280.0517                             | 0.3029                                 | 3.30E-82       | Down                          |
| <i>Ndnf</i>      | 14.4030                           | 7.2857                               | 0.5058                                 | 2.69E-07       |                               |
| <i>Nectin3</i>   | 40.4463                           | 46.7260                              | 1.1553                                 | 0.040115       |                               |
| <i>Nes</i>       | 154.0543                          | 139.4857                             | 0.9054                                 | 0.113309       |                               |
| <i>Neurod1</i>   | 25.7937                           | 57.3560                              | 2.2236                                 | 3.24E-24       | Up                            |
| <i>Neurog2</i>   | 8.0707                            | 11.4840                              | 1.4229                                 | 0.024105       |                               |
| <i>Nfe2l3</i>    | 32.5893                           | 13.6113                              | 0.4177                                 | 1.37E-20       | Down                          |
| <i>Nfia</i>      | 90.3220                           | 51.2337                              | 0.5672                                 | 1.08E-20       |                               |
| <i>Nfib</i>      | 468.0543                          | 355.3367                             | 0.7592                                 | 4.57E-07       |                               |
| <i>Npy</i>       | 85.7723                           | 8.9253                               | 0.1041                                 | 8.12E-68       | Down                          |
| <i>Nr2f1</i>     | 143.1300                          | 229.9617                             | 1.6067                                 | 4.96E-12       |                               |
| <i>Nr4a2</i>     | 1.9953                            | 1.3277                               | 0.6654                                 | 0.081463       |                               |



|                |          |          |        |           |      |
|----------------|----------|----------|--------|-----------|------|
| <i>Nrgn</i>    | 49.7640  | 17.6927  | 0.3555 | 6.78E-20  | Down |
| <i>Olig2</i>   | 38.3457  | 50.0673  | 1.3057 | 0.000142  |      |
| <i>Otx1</i>    | 20.5597  | 9.2867   | 0.4517 | 5.07E-10  | Down |
| <i>Pax6</i>    | 24.0463  | 34.8653  | 1.4499 | 3.94E-05  |      |
| <i>Pou3f2</i>  | 264.0683 | 280.4107 | 1.0619 | 0.337626  |      |
| <i>Ppp1r1b</i> | 47.6270  | 12.8493  | 0.2698 | 1.03E-53  | Down |
| <i>Rbfox3</i>  | 104.7737 | 113.3613 | 1.0820 | 0.188484  |      |
| <i>Reln</i>    | 174.1560 | 121.2583 | 0.6963 | 4.45E-13  |      |
| <i>Rgs4</i>    | 29.5603  | 27.7073  | 0.9373 | 0.554033  |      |
| <i>Rorb</i>    | 56.7790  | 9.3097   | 0.1640 | 3.92E-89  | Down |
| <i>Satb2</i>   | 402.6917 | 407.2697 | 1.0114 | 0.838447  |      |
| <i>Slc1a3</i>  | 294.8673 | 255.3190 | 0.8659 | 0.030710  |      |
| <i>Sox5</i>    | 150.7883 | 51.6850  | 0.3428 | 9.69E-79  | Down |
| <i>Sox9</i>    | 27.9057  | 56.4387  | 2.0225 | 5.07E-21  | Up   |
| <i>Tbr1</i>    | 218.1170 | 220.2417 | 1.0097 | 0.852625  |      |
| <i>Tle4</i>    | 122.0870 | 20.3317  | 0.1665 | 6.82E-189 | Down |
| <i>Trp73</i>   | 3.9413   | 2.6277   | 0.6667 | 0.049168  |      |
| <i>Vldlr</i>   | 108.7620 | 93.8580  | 0.8630 | 0.032990  |      |
| <i>Zbtb20</i>  | 161.2430 | 188.7323 | 1.1705 | 0.091927  |      |
| <i>Zbtb22</i>  | 39.2477  | 60.6777  | 1.5460 | 1.38E-09  |      |
| <i>Zbtb46</i>  | 32.5373  | 37.5260  | 1.1533 | 0.086626  |      |
| <i>Zfpm2</i>   | 30.4113  | 9.8067   | 0.3225 | 3.27E-26  | Down |

---
